# Supplementary material
Source: PubMed Central journal article supplement (PMC8492019)
Supplement: mmc1.pdf [file mmc1.pdf]

# THE LANCET

## Supplementary appendix

This appendix formed part of the original submission. We post it as supplied by the authors.

**This online publication has been corrected. The corrected version first appeared at [thelancet.com](http://thelancet.com) on January 27, 2022.**

Supplement to: Myers SS, Pivor JI, Saraiva AM. The São Paulo Declaration on Planetary Health. *Lancet* 2021; published online Oct 5. [http://dx.doi.org/10.1016/S0140-6736\(21\)02181-4](http://dx.doi.org/10.1016/S0140-6736(21)02181-4).

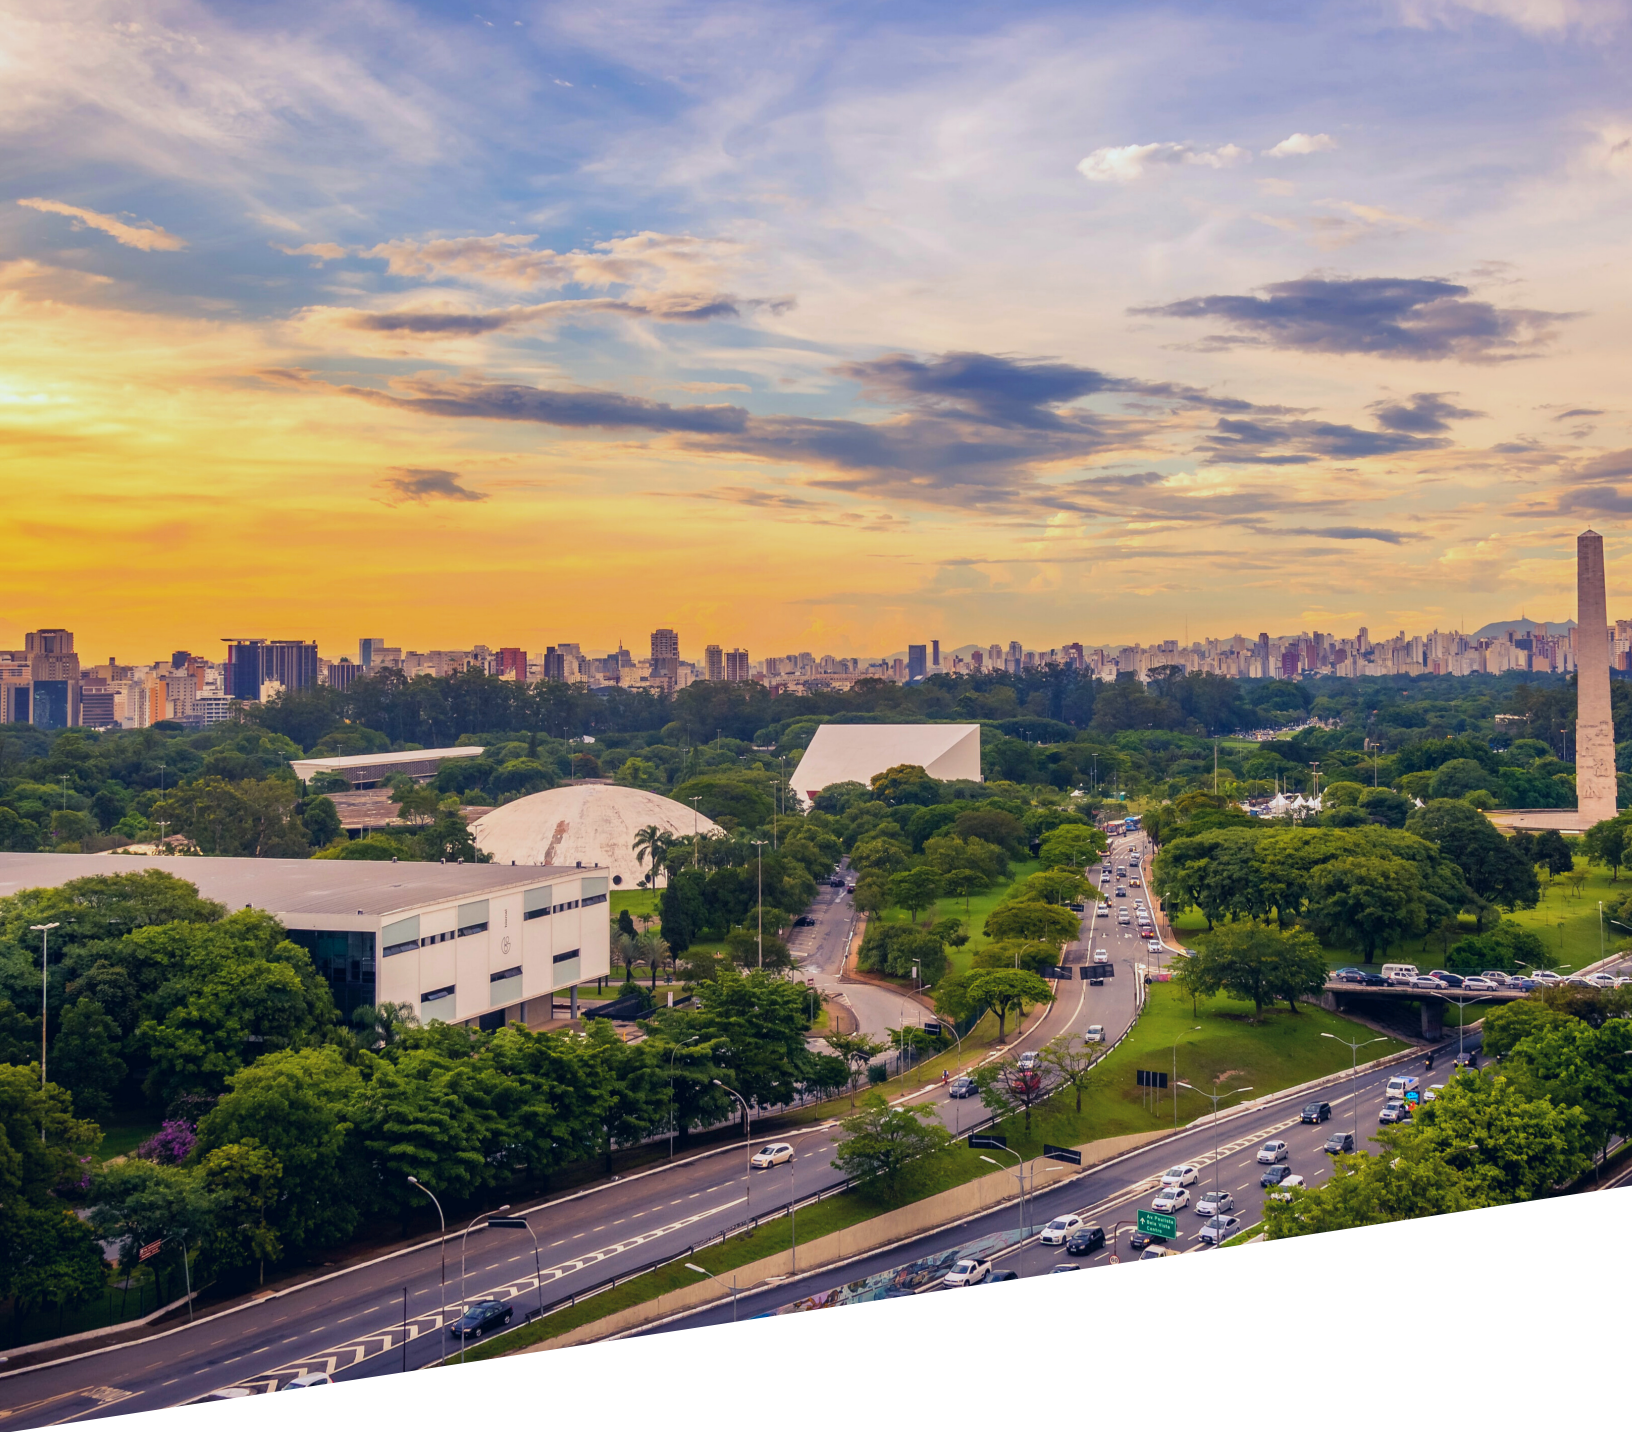

# São Paulo Declaration on Planetary Health

---

OCT 6TH, 2021

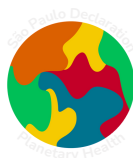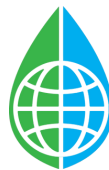

**PLANETARY  
HEALTH  
ALLIANCE**

**USP**  
Universidade  
de São Paulo

# TABLE OF CONTENTS

---

|       |                                              |
|-------|----------------------------------------------|
| 2 --  | <b>INTRODUCTION</b>                          |
| 3 --  | <b>KEY MESSAGES</b>                          |
| 3 --  | FOR ALL                                      |
| 3 --  | FOR THE AGRICULTURAL SECTOR AND FOOD SYSTEMS |
| 3 --  | FOR ARTISTS, POETS, WRITERS, AND MUSICIANS   |
| 4 --  | FOR BUSINESSES                               |
| 4 --  | FOR CITIES AND URBAN PLANNERS                |
| 4 --  | FOR ECONOMISTS                               |
| 5 --  | FOR FINANCIAL INSTITUTIONS                   |
| 5 --  | FOR FUNDERS                                  |
| 5 --  | FOR GOVERNMENTS                              |
| 6 --  | FOR HEALTH PRACTITIONERS                     |
| 6 --  | FOR THE HEALTH SECTOR                        |
| 6 --  | FOR INTERNATIONAL ORGANIZATIONS              |
| 7 --  | FOR JURISTS AND LAWMAKERS                    |
| 7 --  | FOR MEDIA                                    |
| 7 --  | FOR RESEARCHERS                              |
| 8 --  | FOR SCHOOLS                                  |
| 8 --  | FOR SPIRITUAL LEADERS OF ALL FAITHS          |
| 8 --  | FOR TECHNOLOGY PROFESSIONALS                 |
| 9 --  | FOR UNIVERSITIES AND HIGHER EDUCATION        |
| 9 --  | FOR YOUTH REPRESENTATIVES                    |
| 10 -- | <b>CONCLUSION</b>                            |
| 11 -- | <b>SIGNATORIES</b>                           |
| 18 -- | <b>CONTRIBUTORS &amp; ACKNOWLEDGEMENTS</b>   |

# INTRODUCTION

We, the global planetary health community, raise an alarm that the ongoing degradation of our planet's natural systems is a clear and present danger to the health of all people everywhere. A just, global transition in how we live is required to optimize the health and well-being of people and the living world in which we are embedded.

The COVID-19 pandemic is the most recent in a series of distress signals ringing around the world. Climate change, biodiversity loss, and destruction of the quality of air, water, and soil are eroding the fundamental life support systems that we all depend on. From tropical storms devastating populations across the Caribbean and Pacific, historic heat waves and fires from North America to Australia and the Amazon, to the worst locust outbreak in 70 years destroying crops in East Africa, lives and livelihoods have been lost particularly among the most poor and marginalized communities. Every dimension of human health and well-being is now affected by global environmental change. The planetary health science is clear: we can no longer safeguard human health unless we change course.

We need a fundamental shift in how we live on Earth, what we are calling the Great Transition. Achieving the Great Transition will require rapid and deep structural changes across most dimensions of human activity. This includes how we produce and consume food, energy, and manufactured goods; how we construct and live in our cities; and how we consider and measure growth, progress and development, and govern ourselves. It will also require rethinking our values and relationship within Nature and to each other from human exceptionalism, domination, and scarcity to interdependence, equity, and regeneration. The Great Transition offers the possibility of greater richness of experience, greater well-being, and an enhanced opportunity for all beings to thrive. It will take practitioners, scholars, and policy makers across every dimension of human activity working together. It will require listening to, integrating, and amplifying voices in every community from Indigenous Peoples, faith traditions, artists, entrepreneurs, to scientists. Every person, in every place, from every calling, has a role to play in safeguarding the health of the planet and people for future generations.

This declaration was produced by the planetary health community at the 2021 Planetary Health Annual Meeting in São Paulo, Brazil, and is supported by the below signatories. We represent communities that are bridged across geographies, cultures, sectors, disciplines, and generations. We call on governments, the private sector, civil society, and the general public to commit to the Great Transition to safeguard a healthy and equitable future for humanity and protect all life on Earth.

# KEY MESSAGES

## **For All--**

Set an intention. We invite you to consider yourself a partner in planetary healing. We all live together in an interconnected world and the actions of each of us inspire others. Therefore, together, we pledge to dedicate our lives to the service of humanity, and to the protection and restoration of the natural systems on which humans and all other species who share our home depend.

## **For the Agricultural Sector and Food Systems--**

Recognize that the agricultural sector and food systems are at the center of planetary health in terms of meeting our global food needs, achieving social justice, and decreasing our footprint on natural systems. How this sector moves forward with agricultural practices and food options will determine the future of human health and well-being. Promote sustainable intensification practices as well as healthy diets, and include planetary health experts in developing solutions to reduce the environmental and health impacts of this sector. Utilize all ways of knowing, including the latest science and millennia of traditional and Indigenous knowledges, to implement agricultural systems that meet demand and reduce pressure on natural systems.

## **For Artists, Poets, Writers, and Musicians--**

Help humanity fashion new narratives about our relationship to Nature and to each other that rejects the myth of human exceptionalism and emphasizes our interdependence. Revitalize and highlight the richness and beauty of the diverse cultural traditions and languages that we have, especially to celebrate environment and health interlinkages. Create art that reflects what the Great Transition can look and feel like, and inspires the public to act.

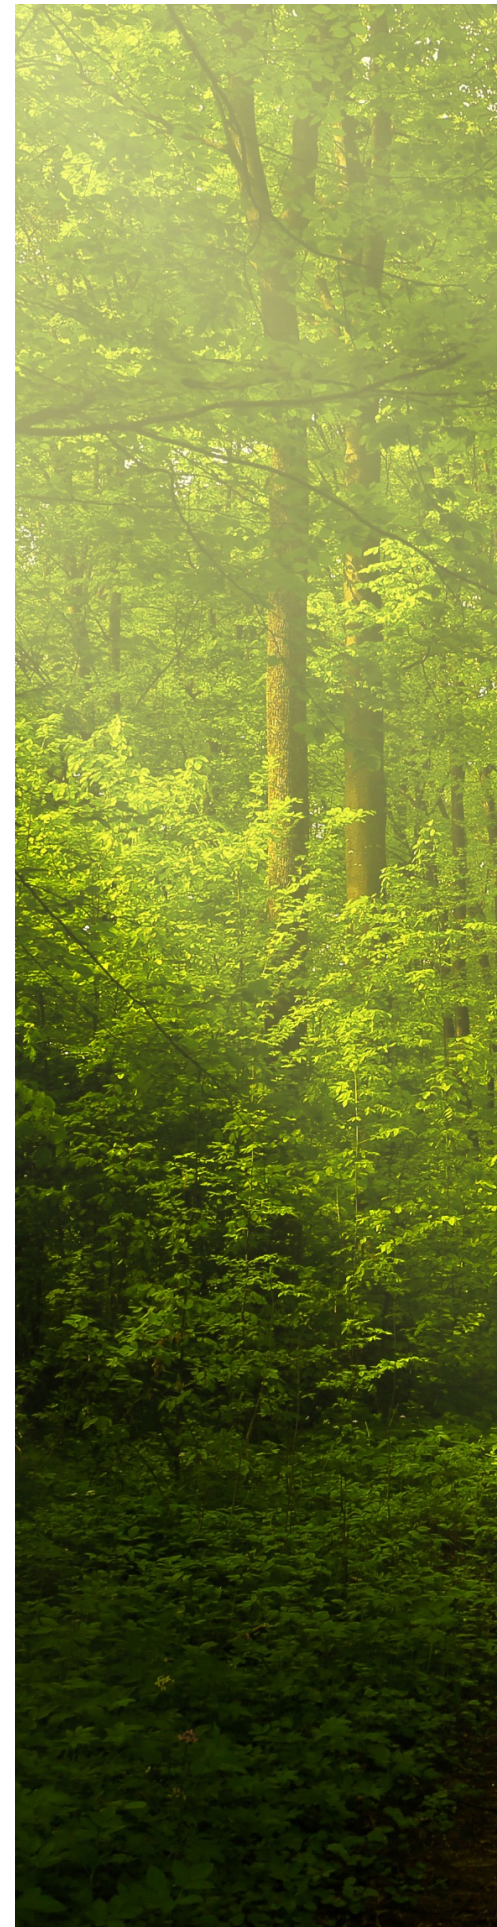

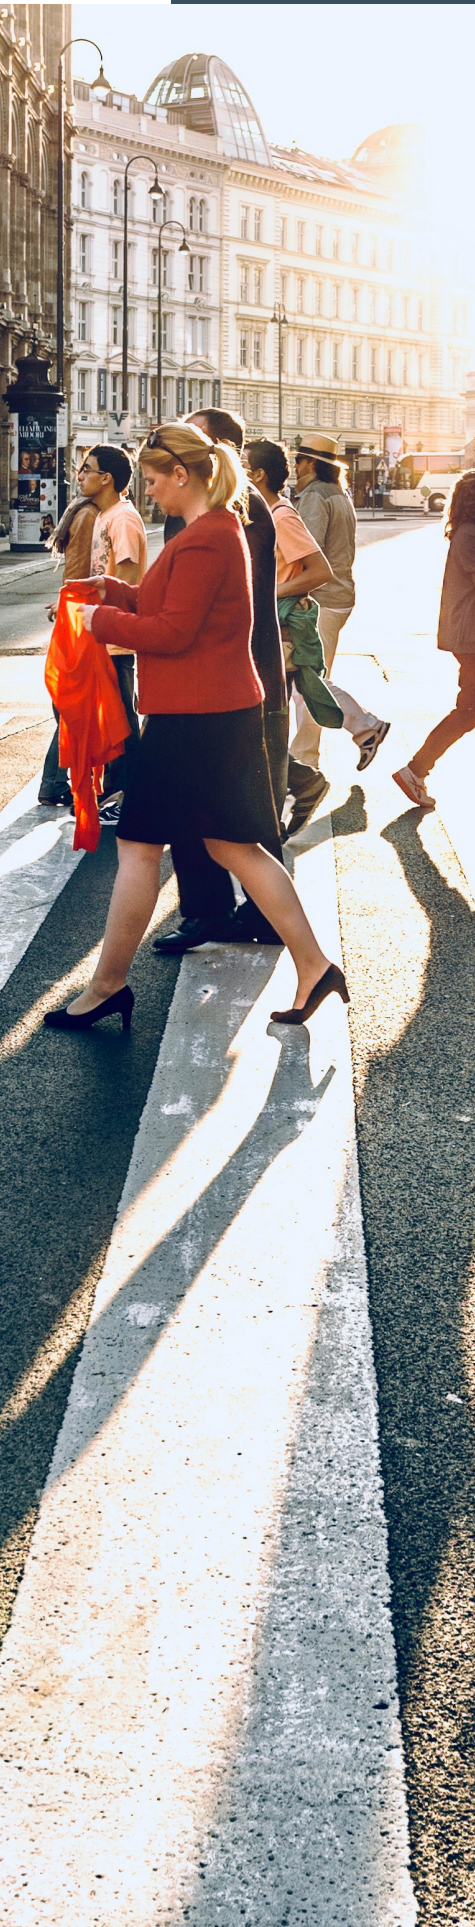**For Businesses--**

The sustainability and long-term profit of businesses depends on the well-being of society and Nature. Investments and corporate principles must correspond to planetary health values and strategies that decrease greenhouse gas emissions, increase biodiversity, reduce soil, air and water pollution, and improve health equity. Companies must begin investing in and implementing plans for net-zero, Nature-positive businesses immediately, and uphold agreements already in place including the Aichi and Paris accords. To achieve this, enact sustainable economic and business models that respect planetary boundaries and operationalize planetary health. Advocate for government policies and incentives that promote the Great Transition.

**For Cities and Urban Planners--**

Recognize that most of humanity now lives in cities, and that this trend will continue with much of the world's future population growth expected to be in cities in developing economies. Design cities with environmentally-friendly materials that can be reused and recycled. Design and incentivize green, energy efficient buildings in neighborhoods mapped out with outdoor spaces and optimized for active transportation. Ensure accessible public transportation for all inhabitants to reduce automobile usage and promote equity. Create waste management systems that protect surrounding ecosystems and recapture energy and water. Design cities to meet their potential to dramatically reduce our ecological footprints while optimizing physical and mental health.

**For Economists--**

Promote planetary health by transitioning away from Gross Domestic Product (GDP) growth as the primary metric for measuring economic success and development. Instead, emphasize metrics and investments that support preservation and regeneration of Nature, human well-being, equity, and happiness--the things we truly value. This would allow the economy to serve all of us and the living world in which it is embedded.

**For Financial Institutions--**

Rethink the meaning of ethical as well as equitable investing and lending in a time when our impacts on natural systems are putting the poorest people in the world, Indigenous communities, and future generations in harm's way. Do not invest in projects and enterprises that profit from degrading Nature and thus harming humankind. Rather, prioritize those that emphasize human well-being and regeneration of natural systems.

**For Funders--**

Allocate long-term and stable funding for generating new planetary health knowledge and the translation of that knowledge into practice. Support scaling up planetary health solutions as well as reducing vulnerabilities and inequities in communities worldwide. Focus on transdisciplinary research, policy, practice, and social movement building to encourage revitalization efforts and progressive actions for our most pressing planetary health needs. Co-design calls for grants based on the needs of end-user stakeholders. Break down systemic barriers for accessing capital by prioritizing funding that reaches those who are representative of their communities.

**For Governments--**

Center planetary health in international, national, and local policies, recovery plans, and budgets, specifically in post COVID-19 plans and economic and environmental policies. Implement actions for a just economic decarbonization and energy transition for a green and healthy recovery. The health co-benefits and co-harms of policies must be considered and evaluated in government decision-making now and into the future. As an urgent first step, take action to promote public access to health services as a human right. Work with the most marginalized and disenfranchised communities facing the disproportionate effects of planetary health issues. Listen to and entrust them with the resources to develop solutions. Center inclusion and equity when developing plans and solutions as that is the way to achieve a healthy and safe world for all.

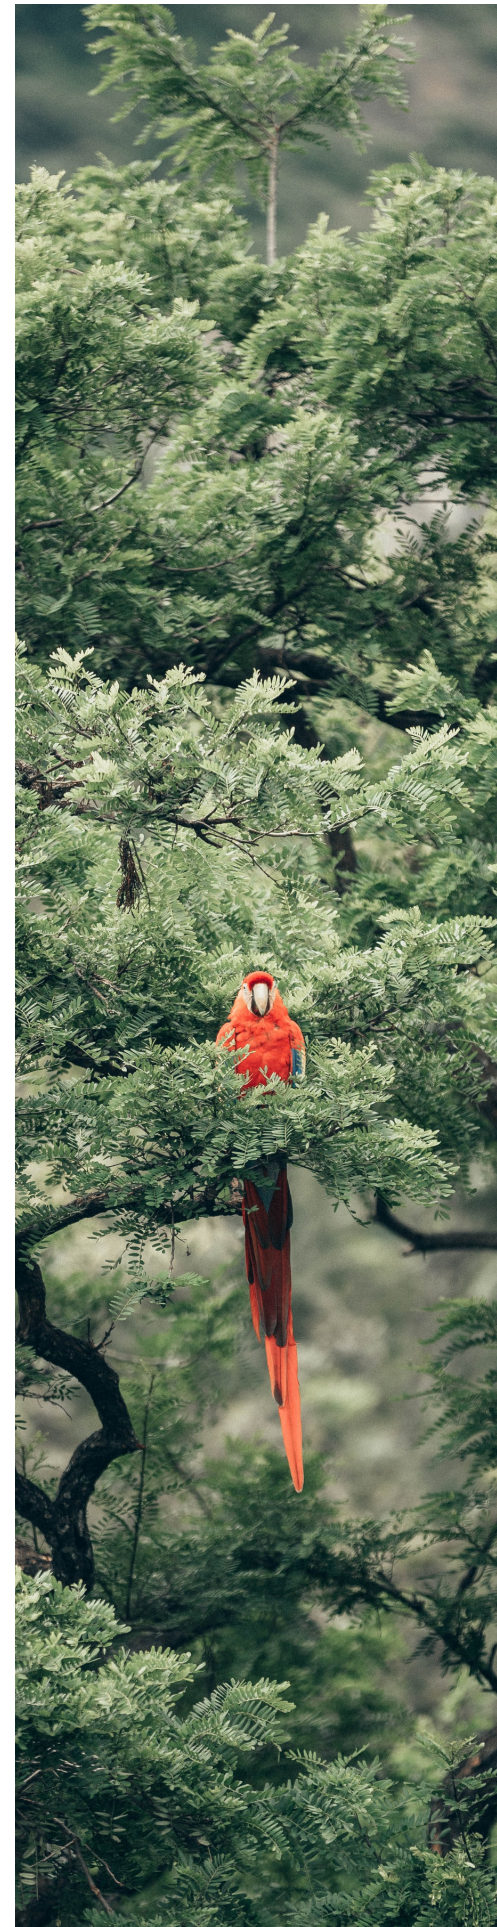

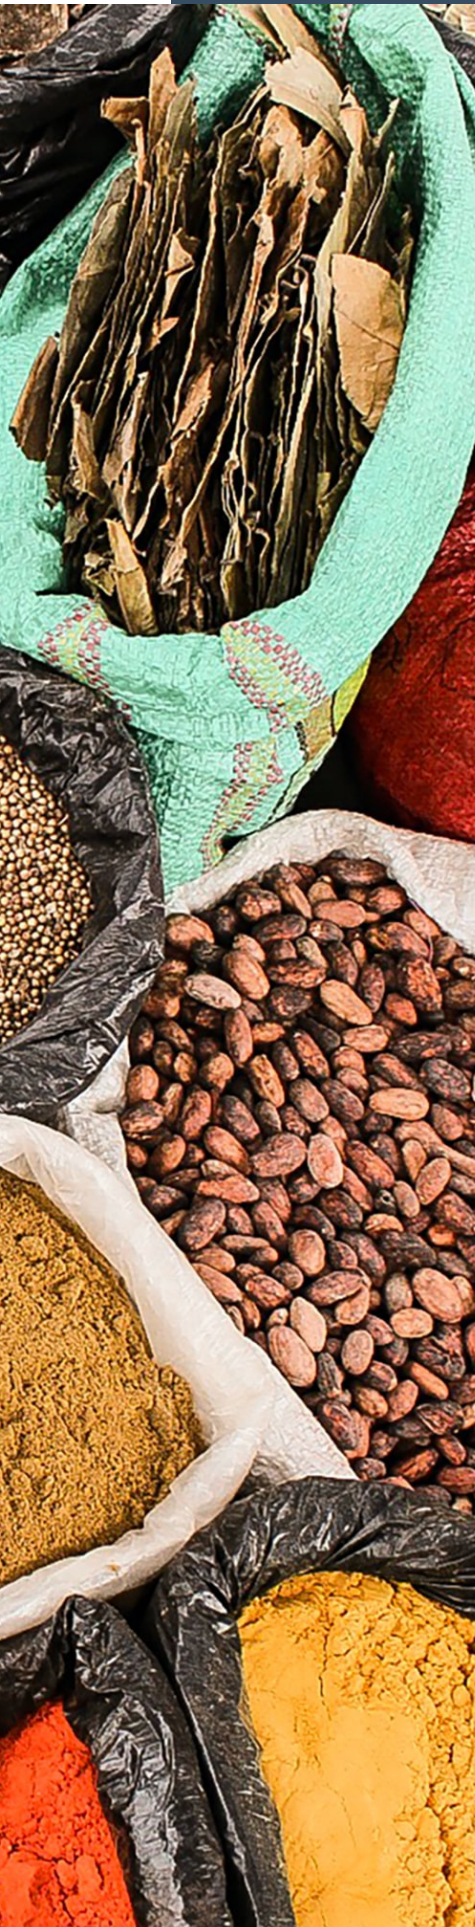**For Health Practitioners--**

Immediately incorporate planetary health concepts and values into the main curricula and professional codes of conduct for all future health practitioners. Educate patients on the concepts of planetary health and utilize health practitioners' trusted voices to raise awareness about the adverse effects of our current dysfunctional relationship with our planet. Draw upon diverse knowledge practices beyond westernized disciplines including those of Indigenous Peoples. Advocate for patient-centered policies that advance planetary health, including public access to health services as a human right, and incorporate solutions and community services beyond the clinic.

**For the Health Sector--**

Reorient all aspects of health systems toward planetary health--from procurement, energy sources, healthcare efficiency, to waste reduction. Commit to achieving a Nature-positive, carbon neutral healthcare system before 2040, while strengthening health systems' resilience to global environmental changes. Disease prevention, health promotion, and health equity must be at the heart of this transition. Incorporate health perspectives and practices beyond traditional Western methods, including traditional knowledges led by Indigenous Peoples, as well as other integrative health practices. Consider social and ecological determinants of health for both individuals and communities, including public and active transportation; access to health care facilities; green spaces to provide social, recreational, and mental health benefits; air, soil, and water quality; and access to affordable and nutritious diets, particularly for lower income communities. Advocate for public access to culturally appropriate health services as a human right.

**For International Organizations--**

Overcome silos for an inclusive form of multilateralism that centers healthy people and a healthy planet and recognizes their interdependence. Cross-cutting, transdisciplinary cooperation is imperative to merge multiple agendas and strengthen the health-environment nexus. Work towards enhanced governance through equitable influence of low-, middle- and high- income countries and the protection of human and environmental rights.



**For Jurists and Lawmakers--**

Improve governance mechanisms including transparency and accountability, and hold those who cause planetary health damage to account. Advocate and urgently implement the legal recognition of the 'Rights of Nature' through legal personhood of Nature designation. Additionally, advocate for ecocide as a crime within international law, while also recognizing Indigenous First or Natural law around the globe, prioritizing the rights of Nature. In addition, create policies and legal structures that ensure future generations have at least the same quality of life as we do now.

**For Media--**

The Great Transition depends on a free press and an open platform for discussions, connections, and sharing. Commit to inform and educate society on planetary health science, values, challenges, and solutions. Tell the stories of those who are protecting Nature and fighting for justice and equity, and elucidate the connections between their actions, a safe environment, and human health. Hold to account those who are damaging the planet's natural systems and mistreating other people. Inspire and motivate rather than eliciting fear. Use imagery that is honest and respects the dignity of peoples portrayed. Fight infodemics of misinformation, and lift up the voices of those who do not traditionally hold power.

**For Researchers--**

Engage with and initiate transdisciplinary efforts to inform and operationalize planetary health-focused research, policy, and practice, with an emphasis on solution-focused inquiry and applications that are inclusive of all ways of knowing and backgrounds. Work actively to promote a fair and equitable research and education environment involving middle- and low-income countries, so that all scientists can be real partners in finding solutions for our common problems. Promote open science principles and practices. Elevate co-designed and participatory-based research with communities. Emphasize methods and collaborations to better communicate planetary health and increase public and political awareness. Work to develop solutions for all those in need.

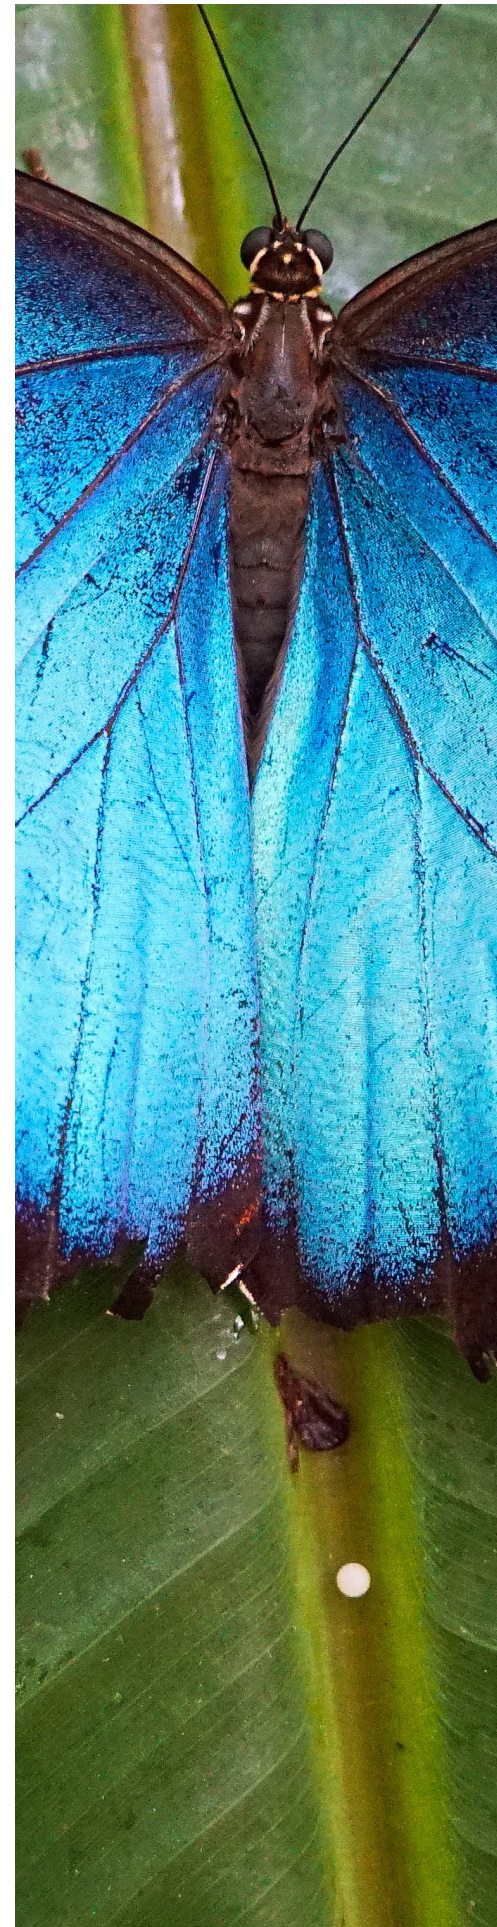

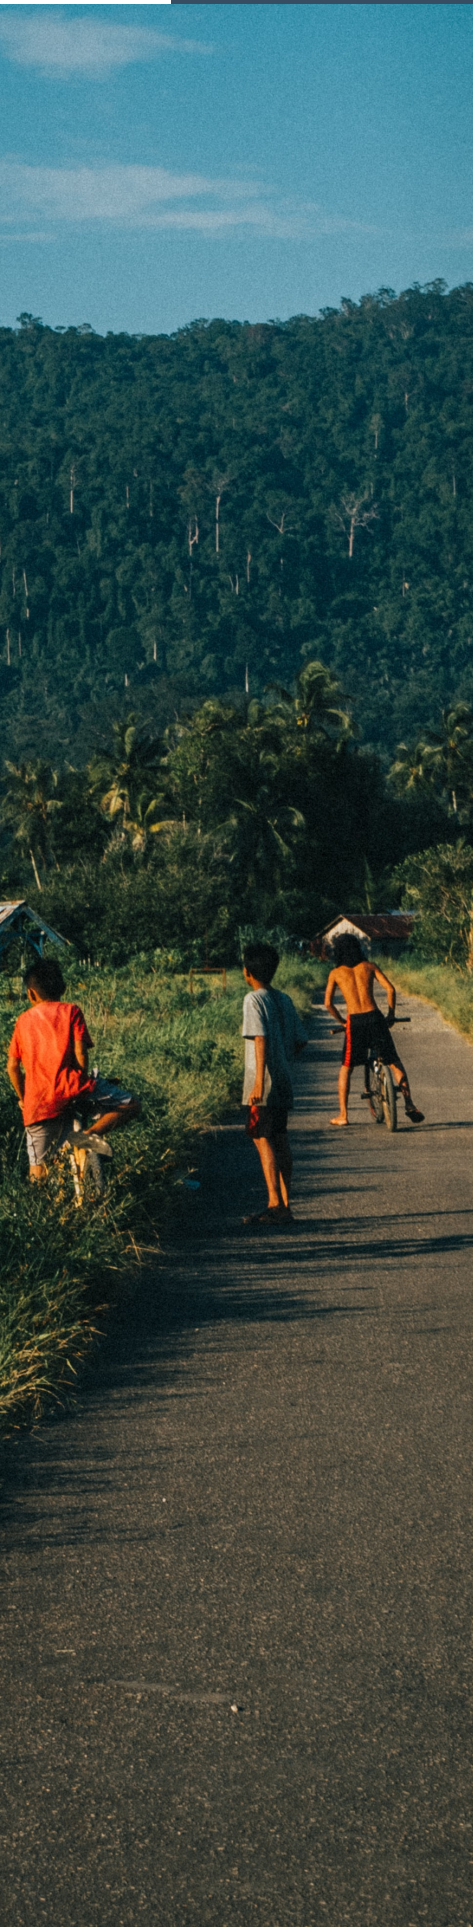**For Schools--**

Teach planetary health education from an early age. Advance universal education and embed planetary health throughout primary and secondary school levels, while ensuring women and girls have equity in access to such information. Utilize transdisciplinary and participatory approaches to design teachers' education and training materials, as well as school materials that are appropriate for specific age groups and contexts. Incorporate Nature-based and experiential learning outside of the classroom. Educate and empower youth to become current and future leaders of planetary health action, and foster their ability to influence the decision-making of their parents, communities, and beyond.

**For Spiritual leaders of all faiths--**

Lead in the creation of unity and solidarity among all peoples of the world, based on our shared, common home. Expand the mindset of humanity to embrace ancient teachings and wisdom to foster a flourishing and pluralistic civilization in harmony with the planet. Help guide people to reinvest in our relationship within Nature with the reverence and awe that is felt by so many, and emphasize the moral dimension of protecting all life on Earth. Utilize religious and spiritually affiliated institutions for planetary health education, training, engagement, and action.

**For Technology professionals--**

Consider the power and the impact of technology to facilitate transformative solutions for the benefit of all people and the planet, and to transmit evidence-based information. Support international work designed to prevent web-based misinformation. Design technology for longevity in order to reduce waste. Co-develop tools with local stakeholders adapted to contextual needs and planetary demands, while not forgetting lessons from Nature, traditional societies, and past undertakings. Engage across disciplines, sectors, and worldviews to develop and advance planetary health promoting technologies, as well as to ensure accessibility and transparency are at the forefront of design and decision-making.

**For Universities and Higher Education--**

Advocate for and prioritize the allocation of resources to enable and encourage transdisciplinary planetary health scholarship and education within and between institutions. Align faculty promotion and research incentives courageously to better ensure co-creation and translation of evidence into applicable policy and practice. Ensure that planetary health curricula are embedded in all programs and faculties in order to foster planetary health citizens, regardless of discipline. Promote access and equity across institutions so that all people can participate in research and education.

**For Youth Representatives--**

Recognize the importance of all generations in the Great Transition. Empower your peers and elders to advocate for planetary health. Push back against the common tokenization of youth to ensure young people and future generations have an equal seat at decision-making tables. Join planetary health groups, organizations, and co-create in service for your and all generations. Be brave and creative in your reimagining of and leadership toward a future that is healthy and fair for all beings.

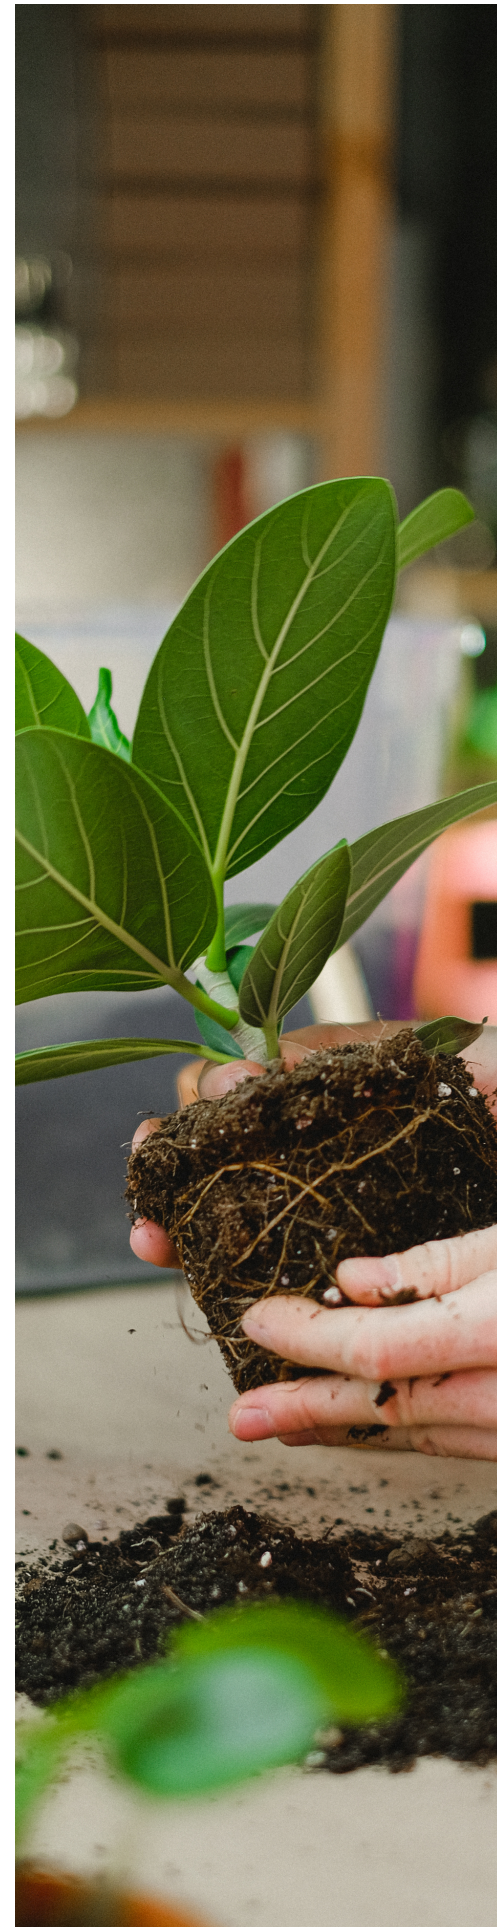

## CONCLUSION

We, the planetary health community, call upon all stakeholders to take urgent and decisive action to achieve the Great Transition. Our recommendations and list of stakeholders are not exhaustive. Rather, they are a compass guiding us towards the most promising pathways to support a more just and resilient post-pandemic world. We cannot work or live in silos: catalyzing and implementing fundamental shifts in how we live on Earth will require systemic partnerships across all of human society. While everyone has their own unique role, only by working together as a global community, rooted in planetary health principles, can we co-create to achieve the Great Transition.

---

# SIGNATORIES

38a Subseção da Ordem dos Advogados do Brasil - OAB Santo André  
50by40  
ABECO  
Abubuwa Societal Development Initiative  
Academia de Letras do Brasil  
Academy of Integrative Health & Medicine (AIHM)  
African Council of Religious Leaders-Religions for Peace  
Alana Institute  
Alliance of Nurses for Healthy Environments  
Alliance Santé Planétaire (France)  
ALOHAS Regenerative Foundation  
Amazônia 4.0  
Ambulatório de Saúde Integrativa da Universidade Estadual de Ponta Grossa  
American Public Health Association  
Androscience, Science & Innovation Center in Andrology  
AQAL Capital GmbH  
Arctic Indigenous Wellness Foundation  
Associação Brasileira de Ciência Ecológica e Conservação  
Associação Brasileira de Enfermagem - Seção São Paulo  
Associação Brasileira de Terapia Comunitária Integrativa  
Associação de Fomento à Autonomia  
Association of Accredited Naturopathic Medical Colleges  
Barcelona Institute for Global Health (ISGlobal)  
Beyond Meat  
Bhumi Global  
Biomimicry Innovation Lab Limited  
Blue Ventures Conservation  
Boston University Institute for Sustainable Energy  
Branche santé climat environnement - AEMG  
Brazilian Academy of Sciences  
Brazilian Association for Research in Science Education (ABRAPEC)  
Brazilian Association of Collective Health  
Brazilian Enterostomal Therapy Association  
Brazilian Platform on Biodiversity and Ecosystem Services/BPBES  
Brazil-UK Centre for Arbovirus Discovery, Diagnosis, Genomics and Epidemiology - CADDE  
Business for Nature Coalition  
California Academy of Sciences  
Canadian Association of Nurses for the Environment  
Canadian Association of Physicians for the Environment

Canadian College of Naturopathic Medicine  
Canadian Federation of Medical Students Health and Environment Adaptive Response Taskforce (CFMS HEART)  
Canadian Medical Association  
CANAVIERA  
Care2Communities  
Caribbean College of Family Physicians  
Cary Institute of Ecosystem Studies  
Casa Aliada  
Center for Earth Ethics  
Center for International Forestry Research  
Center for Studies in Management and Public Policies (GPUBLIC/IEA/USP)  
Center for World Indigenous Studies  
Centre for Planetary Health and Food Security, Griffith University  
Centre on Climate Change and Planetary Health, London School of Hygiene & Tropical Medicine  
Centro Brasileiro para o Cuidado à Saúde Baseado em Evidências: Centro de Excelência do JBI  
Centro de Ciências Agrárias (CCA) - Federal University of São Carlos (UFSCar)  
Centro Interamericano para la Salud Global  
Centro Universitário CESUCA  
Centro Universitário de João Pessoa - UNIPÊ  
Centro Universitário Módulo  
Cepedoc Cidades Saudáveis WHO/PAHO Collaborator Centre  
ChefMD  
Chiesi Farmaceutici S.p.A  
CIDIS - Centre interdisciplinaire de développement international en santé, Université de Sherbrooke, Canada  
Climate Cares, Institute of Global Health Innovation and Grantham Institute, Imperial College London  
Climate Emergency Institute  
Climate for Health, ecoAmerica  
Clube Brasileiro de Saúde Planetária  
Coalizão Ciência e Sociedade  
Colégio Brasileiro de Medicina de Estilo de Vida  
Colégio CEUNSP Itu  
Colégio CEUNSP Salto  
Colégio Cruzeiro do Sul  
Colégio São Sebastião  
Collectif Environnement Santé 74  
Collectif Strasbourg Respire  
Collège de la Médecine Générale (France)  
College of Family Physicians of Canada  
Comissão de Pesquisa da Escola de Comunicações e Artes da Universidade de São Paulo - ECA USP  
Community and Family Aid Foundation-Ghana  
Connected Advocacy for Empowerment and Youth Development Initiative  
Conservation International

Consórcio Acadêmico Brasileiro de Saúde Integrativa  
Consortium of Universities for Global Health  
CoPEH-Canada  
CREN - Centro de Recuperação e Educação Nutricional  
Cruzeiro do Sul Educacional  
Cruzeiro do Sul Virtual  
Cultural Strategies Council  
Cyprus International Institute for Environmental and Public Health  
Daniel Black + Associates | db+a  
Departamento Salud Pública, Universidad de Talca  
Doctors for Planetary Health - West Coast  
Dynamic Planet  
EarthMedic and EarthNurse Foundation for Planetary Health  
Eco-Heart Alliance  
Egyptian Family Medicine Association  
Environmental Physiotherapy Association  
Environmental Studies Nucleus - University of Ceara State  
Équiterre  
Escola Politécnica, Universidade de São Paulo  
Espace pour la vie Montréal  
ESTHER  
European Agroforestry Federation  
Faculdade de Medicina da Universidade de São Paulo  
Faculdade São Sebastião  
Faculty of Public Health and Allied Health Sciences, Praboromarajchanok Institute, THAILAND.  
Famílias pelo Clima  
Front Commun pour la Protection de l'Environnement et des Espaces Protégés (FCPEEP)  
FSG - Centro Universitário da Serra Gaúcha  
Fundação José Luiz Egydio Setúbal  
Fundação Oswaldo Cruz (Fiocruz)  
Fundación Rutas Naturbanas  
Future-Fit Foundation  
Gallifrey Foundation  
Geneva Centre of Humanitarian Studies  
George Mason University  
Girawa  
Global Alliance on Health and Pollution  
Global Choices  
Global Consortium on Climate and Health Education  
Global Ecovillage Network  
Global Observatory on Pollution and Health at Boston College  
Glynwood Center for Regional Food and Farming

GOES Foundation  
Grantham Institute Climate Change and the Environment, Imperial College London  
Greater Boston Physicians for Social Responsibility  
Green Rio  
Grupo Nutrição e Pobreza - Instituto de Estudos Avançados - Universidade de São Paulo  
Harvard Chan C-CHANGE  
Health Hospitals Project  
Health In Harmony  
Health Nature Sustainability Research Group, Deakin University  
Health Professionals for a Healthy Climate  
Health Promotion Forum of New Zealand Runanga Whakapiki Ake I Te Hauora o Aotearoa  
Healthy Planet Healthy People Foundation  
HEDERA Sustainable Solutions GmbH  
Horizonte Ciudadano  
IAG/USP - Instituto de Astronomia, Geofísica e Ciências Atmosféricas da Universidade de São Paulo  
ICLEI Local Governments for Sustainability  
Institut des sciences de l'environnement (ISE) - Université du Québec à Montréal (UQAM)  
Institut du Bon Pasteur  
Institute of Advanced Studies of the University of São Paulo  
Institute of Urban Environment, Chinese Academy of Sciences  
Institute on the Environment, University of Minnesota  
Instituto Adolfo Lutz  
Instituto Caminhos na Mata  
Instituto de Estudos para Políticas de Saúde  
Instituto de Investigaciones en Recursos Naturales, Agroecología y Desarrollo Rural (IRNAD, UNRN - CONICET)  
Instituto de Medicina Integrativa "Ana Gabriela" - Assistência, Educação e Pesquisa em Saúde  
Instituto Ideia Ambiental  
Instituto Pardês de Ecopsicologia  
International Futures Forum  
International Universities Climate Alliance  
inVIVO Planetary Health  
ISPED - Institut de Santé Publique, d'Epidémiologie et de Développement  
Italian Institute for Planetary Health  
IUHPE Global Working Group on Waiora Planetary Health and Human Wellbeing  
Jeunes Médecins  
Jewish Climate Action Network  
Khazar University  
La Planète s'invite en santé / Healthcare for the Planet (Québec)  
LARC Studios  
Living Laudato Si' Philippines  
Love Thy Nature LLC  
MacEwan University



Madagascar Health and Environmental Research - MAHERY

Martel Pasefika Ltd

Masiyembo Association

Medical Society Consortium on Climate and Health

Melbourne School of Population and Global Health, University of Melbourne

Mères au front / Mothers Step In

Munich Science Communication Lab

Nagasaki University

National Academy Of Medicine - Brazil

National Cheng Kung University

Nature's Fynd

Naturopathic Doctors for Environmental and Social Trust

Non Toxic Communities

Nontoxic Certified / MADE SAFE

Núcleo de Hospitais Sustentáveis do Hospital das Clinicas da Faculdade de Medicina de Botucatu

Nurses Drawdown- University of Minnesota

Nutrition and Poverty Research Group - IAE/USP

O Mundo Que Queremos

Openly

Oradea University, Faculty of environment protection

OXI-ZEN

Parque de Ciências e Tecnologia da Universidade de São Paulo

PEPS'L (Prévention Environnement Professionnels de Santé de la région Lyonnaise)

Physicians for Social Responsibility

PlaHNet of Young Professionals

Planet Indonesia

Planetary Emergency Partnership

Planetary Health Alliance

Planetary Health Eastern Africa Hub

Planetary Health Group-Brazil

Planetary Health Network, LSHTM

Planetary Health Philippines

Planetary Health Weekly

PODA - Pakistan

Polynesian Voyaging Society

Population Media Center

Praboromarajchanok Institute

Programa de Pós Graduação em Educação em Ciências: Química da Vida e Saúde - Universidade Federal do

Rio Grande do Sul

Programa de Pós-graduação em Agricultura e Ambiente - PPGAA/UFSCar

Programa de Pós-Graduação em Cidades Inteligentes e Sustentáveis da Universidade Nove de Julho

(UNINOVE), São Paulo, Brasil

Project Drawdown

Project Regeneration  
Projeto RECICLA  
Pull Together Now  
Pure Earth  
Rede Brasileira de Ciência Cidadã (RBCC)  
Rede Brasileira de Interação Planta-Polinizador (REBIPP)  
Rotaract Club of Brusubi  
Rouleaux Foundation  
Royal Botanic Garden Edinburgh  
Royal College of General Practitioners  
Royal Holloway University of London, School of Life Sciences and the Environment  
Salconst  
Sankandi Youth Development Association  
Santé Environnement en Auvergne Rhône-Alpes  
Santerritoire Association  
SciTech DiploHub - Barcelona Science and Technology Diplomacy Hub  
Sense & Learn (SELEA) 2021- Brazil - Copenhagen University  
Sociedad Chilena de Salud Planetaria  
Sociedad Latinoamericana de Investigación en Abejas (SOLATINA)  
Sociedade Beneficente Israelita Brasileira Hospital Albert Einstein  
Sociedade Brasileira de Naturologia - SBNAT  
Société Francophone de Santé et Environnement  
St. Luke's Medical Center College of Medicine-William H. Quasha Memorial  
Sunway Centre for Planetary Health  
SUNY Downstate Health Sciences University  
Superintendência de Controle de Endemias  
Sustentarea  
Swedish Organization for Global Health  
Swiss FinTech Innovation Lab  
SYNERGISTAS  
TerraCycle  
The 51 Percent Project  
The Climate Reality Project Canada  
The Community Check-Up  
The Good Food Institute  
The Shift Project  
The Spice Route Movement (WONCA Young Doctors' Movement of South Asia)  
True Health Initiative  
UC Berkeley Greater Good Science Center  
UCGHI Planetary Health Center of Expertise, One Health Institute, University of California, Davis  
Ukwanda Centre for Rural Health, Stellenbosch University  
Um grau e meio

UN Youth Association of Denmark  
United In Diversity Foundation  
Universidad de La Frontera  
Universidad de Sonora  
Universidade Cidade de São Paulo - UNICID  
Universidade da Integração Latino-americana (UNILA)  
Universidade de Franca (UNIFRAN)  
Universidade de São Paulo  
Universidade de São Paulo Research Committee of the Faculdade de Arquitetura e Urbanismo  
Universidade Federal de Goiás - UFG  
Universidade Positivo  
University of Minnesota School of Nursing  
University of São Paulo Center for Marine Biology  
University of São Paulo Faculty of Veterinary Medicine and Animal Science  
University of Sao Paulo Institute of Biomedical Sciences  
University of São Paulo International Relations Institute  
University of São Paulo Research Provost  
University of Technology Sydney  
UOC - Universitat Oberta de Catalunya  
Verband Botanischer Gärten e.V.  
Vida Veda  
Vilas Beatriz, Ida e Jatai, Sao Paulo, Brazil  
West African Institute of Public Health (WAIPH)  
Wildlife Conservation Society  
Winslow Foundation  
Women Leaders for Planetary Health  
Wonca Rural South Asia  
Wonca Working Party on the Environment  
World Business Council for Sustainable Development (WBCSD)  
World Federation of Public Health Associations  
World Obesity Federation  
World Organization of Family Doctors (WONCA)  
WWF International  
Yale Center on Climate Change and Health  
Yale Forum on Religion and Ecology  
Zenab for women in development

# CONTRIBUTORS & ACKNOWLEDGEMENTS

The following people contributed to drafting the Declaration for consultation:

Marco Akerman  
Enrique Barros  
Arielle Blacklow  
Iris Martine Blom  
Nicole De Paula  
Carol Devine  
Mandeep Dhaliwal  
Braulio Dias

Carlos Faerron  
Renzo Guinto  
Victoria Haldane  
Courtney Howard  
Samuel Myers  
Carlos Nobre  
Dan O'Neil  
Jeremy Pivor

Nicole Redvers  
Antonio Saraiva  
Marie Studer  
Andre Uhl  
Daniela Vianna  
Joanna Wagner  
Cicilia Wangari Githaiga  
Max Zimberg

Over 300 people from more than 70 countries participated in the United Nations Development Programme (UNDP) SparkBlue global consultation whose comments were incorporated into the final Declaration:

Paivi Abernethy  
Andre Luis Acosta  
Krishna Adhikari  
Pool Konrad Aguilar León  
Alonso Aguirre  
Olasunkanmi Ajala  
Filiz Ak  
Kimberly Allen

Mauricio Alonso Basauri Trejo  
Federico Andrade-Rivas  
Gloria Annette Aguirre  
Pearl Anne Ante-Testard  
Marcos Antonio Simplicio Junior  
Luis Gustavo Arruda  
Adnan Arshad  
Muhammad Asaduzzaman

Barbara Astle  
Kevin Athayde  
Anna-Liza Badaloo  
Renato Baena  
Wendy Ball  
Ankush Bansal  
Gerson Barbosa  
Saulo Barboza

|                                 |                                |                           |
|---------------------------------|--------------------------------|---------------------------|
| Isabel Barros                   | Louise Crabtree-Hayes          | Nilanjana Ganguli         |
| Somdutta Barua                  | George Crisp                   | Olga Garcia-Moreno        |
| Sabine Baunach                  | Elena Cromeyer                 | Nataly Gardona            |
| Brett Bayles                    | Elizabeth Cullen               | Thomas Gillespie          |
| Magnus Bein                     | Matheus Vieira da Cunha        | Vanessa Goes              |
| Manijeh Berenji                 | Arisson Rocha da Rosa          | Maria Cristina Gonzales   |
| Erik Berglof                    | Alex da Silva Sousa            | Georgiana Gordon-Strachan |
| Laura Bervian                   | Kerstin Damerau                | Christopher James Graham  |
| Diana Bii                       | Enrique Falceto de Barros      | Liz Grant                 |
| Gloria Blaise                   | Tatiana Souza de Camargo       | Christine Greenhalgh      |
| Iris Martine Blom               | Tiago Brant de Carvalho Falcao | Kim Gruetzmacher          |
| Stacy Blondin                   | Dora de Luca                   | Sushmita Gupta            |
| Christiane Boecker              | Marcel Luis de Moraes Oliveira | Felipe Gusmao             |
| Melanie Boeckmann               | Bruno Meirelles de Oliveira    | Viveka Guzman             |
| Christina Boger                 | Nicole de Paula                | Amanda Haisi              |
| Carolina Bolaños Palmieri       | Merllin de Souza               | Victoria Haldane          |
| Jess Brainch                    | Luz A. de Wit                  | Mahsin Hamuda             |
| Gabriel Burjaili                | Eva Kozub Decotte              | Fiona Hanley              |
| Joanne Burke                    | Jan Dieterle                   | George Hel                |
| Adam Bussan                     | Elina Drakvik                  | Emiliano Hersch Gonzalez  |
| Robert Byron                    | Renata Drehmer                 | Marketa Houskova          |
| Clara Calia                     | Gillian Dunn                   | Hiroto Ide                |
| Juliana Cambronero              | Fatima Elbasri                 | Muhammad Ishaq            |
| Timothy Hudson David Carandang  | Milagros R. Elia               | Tokie Izaki               |
| José Carlos Chacaltana Mendoza  | Mona S. El-Sherbini            | Abubacarr Janneh          |
| Peter Carter                    | Ashley Emerson                 | Neil Jennings             |
| Helotonio Carvalho              | Sibylle Ermler                 | Terry Kemple              |
| Kelen Cavalcante                | João Estellita                 | Irada Khalilova           |
| Fabricio Ccami Bernal           | Lurima Estevez Alvarez         | Benendetta Kiilu          |
| Yuria Celidwen                  | Azqa Fatima                    | Leonardo Toshinobu Kimura |
| CJ Chan                         | Adrian Felipe                  | George Kitching           |
| Ulises Charles Rodriguez        | Nuno G. C. Ferreira            | Katri Kivioja             |
| Zac Chu                         | Bruna Ferreira                 | Carmen Klinger            |
| Max Claron                      | Gabriela Fideles               | Julio Konrath             |
| Natália Coelho Couto de Azevedo | Wilian França Costa            | Luana Ramalho Krauthäuser |
| Fernandes                       | Roberto Fray da Silva          | Fiene Marie Kuijper       |
| Zoe Cohen                       | Howard Frumkin                 | Sathish Kumar             |
| Jennifer Cole                   | Denise Fungaro                 | Rosemary Kumwenda         |
| Darin Collins                   | Peter Furu                     | Arif Rahmat Kurnia        |
| Fliss Connolly                  | Denise Galvin                  | John La Puma              |

|                            |                               |                                |
|----------------------------|-------------------------------|--------------------------------|
| Gwen Landis                | Thomas Moser                  | Susanne Röhr                   |
| Roberta Lavin              | Justin Munyaka                | Verena Rossa-Roccor            |
| Ann Lawless                | Bruno Oliveira                | Nathan Rozman                  |
| Emma Lawrance              | Adetutu Onigbanjo             | Lillian Ruiz                   |
| Alana Lea                  | Ana Ortigoza                  | Ekuwa Sakyi Adade              |
| Lis Leão                   | Rhiannon Osborne              | Salomé Sané                    |
| Camila Pinto Leão          | Melvine Otieno                | Raquel Santiago                |
| Cristian Leal              | Emmanuel James Padagas        | Diego Sanz Yus                 |
| Jessica LeClair            | Susana Paixao                 | Antonio Mauro Saraiva          |
| Hyunju Lee                 | Esteban Pajares               | Lucas Giampietro Terra Saraiva |
| Eduardo Leiva Pinto        | Yasna Palmeiro-Silva          | Paul Schaafsma                 |
| Guilherme Lemes            | Katharine Palmer              | Fabiana Schiavon               |
| Felix Leung                | Siobhan Parslow-Williams      | Eliane Schlemmer               |
| Liudmila Liutsko           | Mathilde Pascal               | Theresa Schwarz                |
| David Lopez-Carr           | Bruno Passaretti              | Tyler Seidel                   |
| Leticia Gabriela Luz       | Carissa Patrone               | Filipe Sene Sousa Santos       |
| Ana K. M. Salcedo          | Kristen P. Patterson          | Anusha Seneviratne             |
| Sandeep Maharaj            | João Pedro Paz Takeuchi       | Muhsin Sheriff                 |
| Konstantinos Makris        | Alison Peel                   | Anita Shervington              |
| Dirce Maria Lobo Marchioni | Cristina Pereira              | Kirsten Shukla                 |
| Filip Maric                | João Emmanuel Anacleto Pessoa | Tiiu Sildva                    |
| Olwenn Martin              | Felipe Petrucci               | Ana Victoria Silva Gonçalves   |
| Lucia Martins              | Naveen Phuyal                 | Filipe Simeão Fröhlich Klug    |
| Menzi Maseko               | Stefanie Pina-Escudero        | Sabrina Simon                  |
| Angela Mashford-Pringle    | Jeremy Pivor                  | David Sinclair                 |
| Carin-Lee Masters          | Teddie Potter                 | Jonathan E. Slutzman           |
| Liliane Mavridara          | Fabienne Pradella             | Leslie Solomonian              |
| Brian G McAdoo             | Susan L. Prescott             | Asli Sonceley                  |
| Michelle McLean            | Gaspard Prevot                | Debora Sotto                   |
| Fausto Medeiros Mendes     | Raluca Radu                   | Lene Søvold                    |
| Seemab Mehmood             | Nahuel Rãos                   | Georgie Sowman                 |
| Fernanda Meire Cioato      | Jennet Razo                   | Ralf Klemens Stappen           |
| Michelle Merrill           | Nicole Redvers                | Anna Maria Stewart Ibarra      |
| Giselle Medeiros Mesiera   | Eli Renee                     | Peter Stoett                   |
| Ian Milimo                 | Ian Jesus Ribeiro             | Lydie Stokes                   |
| Annie Mitchell             | Judit Rius Sanjuan            | Dinah Stratenwerth             |
| Anastasia Montgomery       | Alexandre Robert              | Marie Studer                   |
| Serge Morand               | Roberto Rocha                 | Rupert Suckling                |
| Leonardo Moretti           | Doriam Camacho Rodriguez      | Lucas Sulino Fernandes         |
| Marcos Mitsuo Moriy        | Gerwin John Rodriguez         | Hector Duarte Tagles           |

Byomkesh Talukder  
Elaine Tan Su Yin  
Sonia Tardajos  
Roberto Targa Ferreira  
Luisa Teixeira Francisco e Gontijo  
Armando Toledo  
Tara Tolhurst  
Melissa Toriche  
Fatoumata Toure  
Caroline Tresise  
Sione Tu'itahi  
SanYuMay Tun  
Helena Ueno  
Steve Unwin  
Manuella Vanatko  
Dinar Vasconcelos  
Jose Gerardo Velasco Castañon  
Anvar Velji  
Virgilio Viana  
Nelzair Vianna  
Renato Vieira Alves

Flavia Virginio  
Fanny Voitzwinkler  
Patrick Wachholz  
Diane Wade  
Caryl E. Waggett  
Joanna Wagner  
Rachael Wakefield-Rann  
Lesa Walker  
Sarah Walpole  
Rose Wang  
Sarah Whitmee  
Elizabeth Willetts  
Douglas William Cirino  
Caroline Wimberly  
Domiho Yedenou  
Marisol Yglesias-Gonzalez  
Anita Magdalena Zalisz  
Don Zeigler  
Tianhui Zhong  
Davide Ziveri  
Marya Zlatnik

We would like to thank the United Nations Development Programme (UNDP) for supporting the global consultation on the São Paulo Declaration on Planetary Health through their SparkBlue system. Thank you to Mandeep Dhaliwal, Ludo Bok, Nina Grinman, Andrea Nannipieri, and Zach Hongola for your assistance throughout the consultation. We would like to acknowledge Nadya Shlykova, Caihua Yin, Justin Hiller, Noura Tawil, Ana Catalina Arroyo Sánchez, Alliance Santé Planétaire, Alexandre Robert, Alicia Pillot, Isabelle Thibaudière, Rebeca Camarotto, and Antonio Mauro Saraiva for their help translating the Declaration. Thank you to the Declaration organizing team for their dedication to this initiative since its inception. Finally, we are profoundly grateful to the global planetary health community for their tireless efforts towards achieving the Great Transition.
